# Supplementary material for: Populational Perceptions Regarding Decision to Visit the Emergency Room with Chest Pain During COVID-19
Source: Springer Nature journal article supplement (doi:10.1007/s40119-022-00259-5), 2022-03-22
Supplement: MOESM1 [file 20243864]

## **Supplementary Material**

### **Populational Perceptions Regarding Decision to Visit the Emergency Room with Chest Pain during COVID-19**

Jason J. Han MD<sup>a\*</sup>, William L. Patrick MD<sup>a,b,c\*</sup>, Akhil Rao<sup>a</sup>, Benjamin Smood MD<sup>a</sup>, Mark Helmers MD<sup>a</sup>, Amit Iyengar MD<sup>a</sup>, John J Kelly MD<sup>a</sup>, Saiesh Kalva BA<sup>a</sup>, Pavan Atluri MD<sup>a</sup>, Nimesh Desai MD PhD<sup>a,b,c</sup>, Marisa Cevasco MD<sup>a</sup>

\*Denotes co-first authorship

<sup>a</sup>Division of Cardiovascular Surgery, Department of Surgery, Perelman School of Medicine, University of Pennsylvania, Philadelphia, PA

<sup>b</sup>Leonard Davis Institute, University of Pennsylvania, Philadelphia, Pennsylvania

<sup>c</sup>Penn Cardiovascular Outcomes, Quality, & Evaluative Research Center, Philadelphia, Pennsylvania

#### **Address for correspondence**

Marisa Cevasco, MD

Assistant Professor of Surgery

Division of Cardiovascular Surgery,

Hospital of the University of Pennsylvania

3400 Spruce St, 6 Silverstein Pavilion

Philadelphia, PA

E-mail: [Marisa.Cevasco@uphs.upenn.edu](mailto:Marisa.Cevasco@uphs.upenn.edu)

**Supplementary Table 1** - Example of choice experiment shown to participants

| <i>You are experiencing chest pain. In which of these two situations are you MORE LIKELY to go to the emergency room? Please choose one</i>     |                                                |                                              |
|-------------------------------------------------------------------------------------------------------------------------------------------------|------------------------------------------------|----------------------------------------------|
| <b>Feature</b>                                                                                                                                  | <b>Scenario 1</b>                              | <b>Scenario 2</b>                            |
| How bad is my chest pain?                                                                                                                       | Severe (crushing)                              | Severe (crushing)                            |
| What is the COVID-19 census in the emergency room?                                                                                              | One in ten patients (10%) is COVID-19 positive | One in four patients (25%) is COVID positive |
| Your risk of becoming severely ill or dying from COVID-19?                                                                                      | Low (1%)                                       | High (>10%)                                  |
| You live with people who are elderly or who have medical condition that place them at high risk of becoming severely ill or dying from COVID-19 | Yes                                            | No                                           |

**Supplementary Figure 1** - Normalized mean residuals for regression model

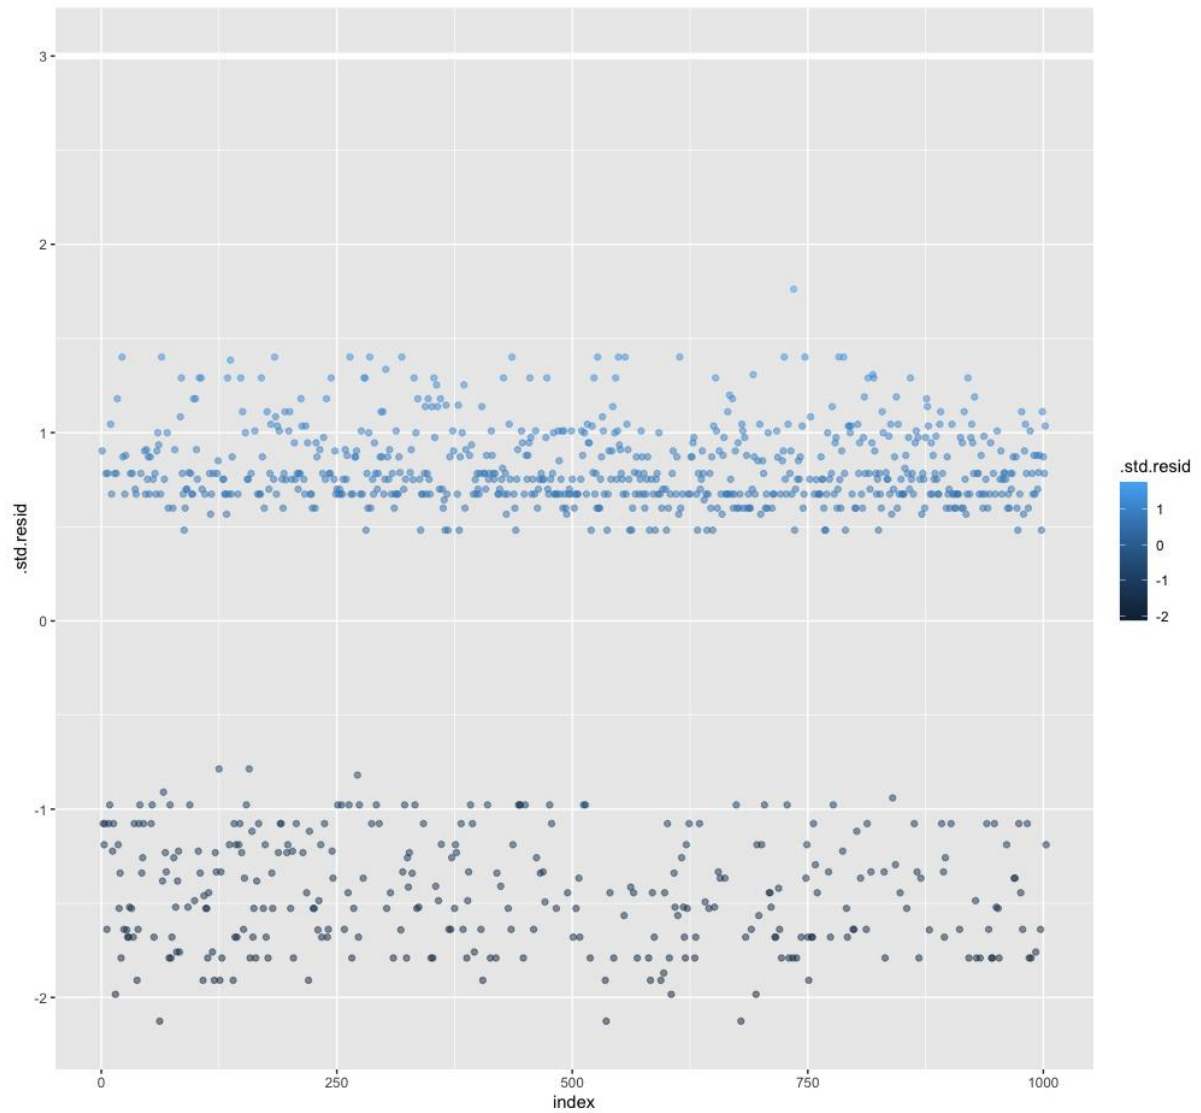

This shows that there are normalized mean residuals beyond three standard deviations of the mean (zero).
