# Supplementary material for: Populational Perceptions Regarding Decision to Visit the Emergency Room with Chest Pain During COVID-19
Source: Springer Nature journal article supplement (doi:10.1007/s40119-022-00259-5), 2022-03-22
Supplement: MOESM2 [file 20243864]

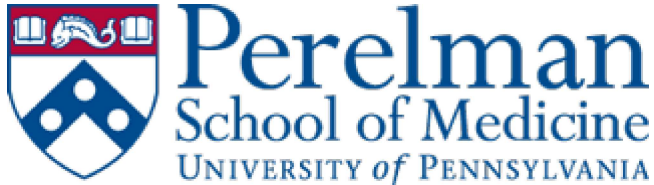

## Block 2

The coronavirus disease (COVID-19) is a potentially lethal infection that is spread person-to-person.

According to the U.S. Department of Health and Human Services, emergency department visits in the U.S. DECREASED during coronavirus pandemic. New York, for example, saw visits decline by over 60%. Why this occurred is not completely understood, though is likely due to perceived risk of contracting COVID-19 from an emergency room.

The following questions are designed to ask how risky you think it is to go to the emergency room during the COVID-19 pandemic.

Participation in this survey is voluntary, and your anonymity will be protected. Click next if you agree to proceed.

The fear of contracting the virus has led to a decrease in the number of people coming into the emergency room during the coronavirus pandemic.

- True
- False

Prior to the beginning of the COVID-19 pandemic, I would go to the emergency room if thought I had an acute life-threatening medical problem (e.g. chest pain, shortness of breath, bleeding, fever, etc.)

- Yes, certainly
- Yes, likely
- Unsure
- No, unlikely
- No, certainly not

## ConjointBlock

(1/3) You are experiencing chest pain. Under which of these two conditions are you MORE LIKELY to go to the emergency room? Choose One

|                                                                                         | Condition 1                                                       | Condition 2                                                       |
|-----------------------------------------------------------------------------------------|-------------------------------------------------------------------|-------------------------------------------------------------------|
| How bad is my chest pain?                                                               | \${e://Field/30c6d667-21b2-418a-8ce7-ac386cb125ca.1.1_CBCONJOINT} | \${e://Field/30c6d667-21b2-418a-8ce7-ac386cb125ca.1.2_CBCONJOINT} |
| What is the COVID census in the emergency room?                                         | \${e://Field/1d38e6b9-87c1-475c-ac0e-d557b32b7aab.1.1_CBCONJOINT} | \${e://Field/1d38e6b9-87c1-475c-ac0e-d557b32b7aab.1.2_CBCONJOINT} |
| Your risk of becoming severely ill or dying from COVID-19                               | \${e://Field/9550c7c0-4faa-4a7d-af00-2d9d0832c0f9.1.1_CBCONJOINT} | \${e://Field/9550c7c0-4faa-4a7d-af00-2d9d0832c0f9.1.2_CBCONJOINT} |
| Do you live with people who are elderly or who have medical conditions that put them at | \${e://Field/7f803e85-419d-46f4-8632-fa704efd318b.1.1_CBCONJOINT} | \${e://Field/7f803e85-419d-46f4-8632-fa704efd318b.1.2_CBCONJOINT} |

|                                                                                  |  |  |
|----------------------------------------------------------------------------------|--|--|
| <p>higher than average risk of becoming severely ill or dying with COVID-19?</p> |  |  |
|                                                                                  |  |  |

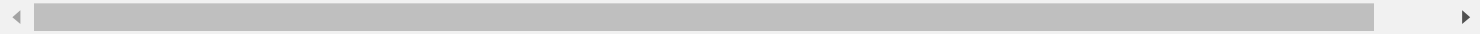

(2/3) You are experiencing chest pain. Under which of these two conditions are you MORE LIKELY to go to the emergency room? Choose One

|                                                                   | Condition 1                                                            | Condition 2                                                            |
|-------------------------------------------------------------------|------------------------------------------------------------------------|------------------------------------------------------------------------|
| <p>How bad is my chest pain?</p>                                  | <p>{e://Field/30c6d667-21b2-418a-8ce7-ac386cb125ca.2.1_CBCONJOINT}</p> | <p>{e://Field/30c6d667-21b2-418a-8ce7-ac386cb125ca.2.2_CBCONJOINT}</p> |
| <p>What is the COVID census in the emergency room?</p>            | <p>{e://Field/1d38e6b9-87c1-475c-ac0e-d557b32b7aab.2.1_CBCONJOINT}</p> | <p>{e://Field/1d38e6b9-87c1-475c-ac0e-d557b32b7aab.2.2_CBCONJOINT}</p> |
| <p>Your risk of becoming severely ill or dying from COVID-19?</p> | <p>{e://Field/9550c7c0-4faa-4a7d-af00-2d9d0832c0f9.2.1_CBCONJOINT}</p> | <p>{e://Field/9550c7c0-4faa-4a7d-af00-2d9d0832c0f9.2.2_CBCONJOINT}</p> |

|                                                                                                                                                                   |                                                                                                                                            |                                                                                                                                            |
|-------------------------------------------------------------------------------------------------------------------------------------------------------------------|--------------------------------------------------------------------------------------------------------------------------------------------|--------------------------------------------------------------------------------------------------------------------------------------------|
| COVID-19                                                                                                                                                          |                                                                                                                                            |                                                                                                                                            |
| Do you live with people who are elderly or who have medical conditions that put them at higher than average risk of becoming severely ill or dying with COVID-19? | <p style="text-align: center;">                     \${e://Field/7f803e85-419d-46f4-8632-fa704efd318b.2.1_CBCONJOINT}                 </p> | <p style="text-align: center;">                     \${e://Field/7f803e85-419d-46f4-8632-fa704efd318b.2.2_CBCONJOINT}                 </p> |
|                                                                                                                                                                   |                                                                                                                                            |                                                                                                                                            |

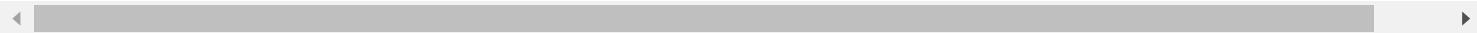

(3/3) You are experiencing chest pain. Under which of these two conditions are you MORE LIKELY to go to the emergency room? Choose One

|                           | Condition 1                                                                                                                                | Condition 2                                                                                                                                |
|---------------------------|--------------------------------------------------------------------------------------------------------------------------------------------|--------------------------------------------------------------------------------------------------------------------------------------------|
| How bad is my chest pain? | <p style="text-align: center;">                     \${e://Field/30c6d667-21b2-418a-8ce7-ac386cb125ca.3.1_CBCONJOINT}                 </p> | <p style="text-align: center;">                     \${e://Field/30c6d667-21b2-418a-8ce7-ac386cb125ca.3.2_CBCONJOINT}                 </p> |
| What is the COVID         |                                                                                                                                            |                                                                                                                                            |

|                                                                                                                                                                                                                                                       |                                                                                  |                                                                                |
|-------------------------------------------------------------------------------------------------------------------------------------------------------------------------------------------------------------------------------------------------------|----------------------------------------------------------------------------------|--------------------------------------------------------------------------------|
| <p>the COVID<br/>census in<br/>the<br/>emergency<br/>room?</p>                                                                                                                                                                                        | <p>{e://Field/1d38e6b9-87c1-475c-<br/>ac0e-<br/>d557b32b7aab.3.1_CBCONJOINT}</p> | <p>{e://Field/1d38e6b9-87c1-475c-<br/>ac0e-<br/>d557b32b7aab.3.2_CBCONJOIN</p> |
| <p>Your risk of<br/>becoming<br/>severely ill<br/>or dying<br/>from<br/>COVID-19</p>                                                                                                                                                                  | <p>{e://Field/9550c7c0-4faa-4a7d-<br/>af00-<br/>2d9d0832c0f9.3.1_CBCONJOINT}</p> | <p>{e://Field/9550c7c0-4faa-4a7d-<br/>af00-<br/>2d9d0832c0f9.3.2_CBCONJOIN</p> |
| <p>Do you live<br/>with<br/>people<br/>who are<br/>elderly or<br/>who have<br/>medical<br/>conditions<br/>that put<br/>them at<br/>higher<br/>than<br/>average<br/>risk of<br/>becoming<br/>severely ill<br/>or dying<br/>with<br/>COVID-<br/>19?</p> | <p>{e://Field/7f803e85-419d-46f4-<br/>8632-<br/>fa704efd318b.3.1_CBCONJOINT}</p> | <p>{e://Field/7f803e85-419d-46f4-<br/>8632-<br/>fa704efd318b.3.2_CBCONJOIN</p> |
|                                                                                                                                                                                                                                                       |                                                                                  |                                                                                |

**Block 2**

Based on your current knowledge, please rank these locations by the degree of risk of COVID-19 transmission (high to low)

Outdoor Park

Grocery Store

Emergency Room

Indoor Bar and Restaurant

Intensive Care Unit ("ICU")

School

Gatherings inside People's Home

During COVID-19, if you experienced the following symptoms, what would you do?

|                     | Wait at home unless it is or becomes too severe | Go to the Emergency Room right away |
|---------------------|-------------------------------------------------|-------------------------------------|
| Severe Chest pain   | <input type="radio"/>                           | <input type="radio"/>               |
| Chest Discomfort    | <input type="radio"/>                           | <input type="radio"/>               |
| Abdominal pain      | <input type="radio"/>                           | <input type="radio"/>               |
| Shortness of breath | <input type="radio"/>                           | <input type="radio"/>               |
| Fainting            | <input type="radio"/>                           | <input type="radio"/>               |
| Back pain           | <input type="radio"/>                           | <input type="radio"/>               |
| Headache            | <input type="radio"/>                           | <input type="radio"/>               |
| Slurred speech      | <input type="radio"/>                           | <input type="radio"/>               |
| Nausea or vomiting  | <input type="radio"/>                           | <input type="radio"/>               |

During COVID-19, which of the following reasons may contribute to your delay in going to the emergency room?

A great deal      A lot      A moderate amount      A little      None at all

|                                                                                                                | A great deal          | A lot                 | A moderate amount     | A little              | None at all           |
|----------------------------------------------------------------------------------------------------------------|-----------------------|-----------------------|-----------------------|-----------------------|-----------------------|
| I fear being close to people in the emergency room who have COVID-19                                           | <input type="radio"/> |
| I fear I will become severely ill with COVID-19                                                                | <input type="radio"/> |
| I fear spreading the virus to family or loved ones who are "high risk" for becoming severely ill with COVID-19 | <input type="radio"/> |
| I fear receiving suboptimal care due to the hospital being focused on COVID-19                                 | <input type="radio"/> |
| I fear that healthcare staff may be accidentally spreading the virus from room to room                         | <input type="radio"/> |

Would you want to know the current number of patients at the hospital or in the emergency room with COVID-19 prior to going in?

Certainly Not      unsure      Certainly

0     1     2     3     4     5     6     7     8     9     10

What is your age range?

- 18 or younger
- 18 to 29
- 30 to 49
- 50 to 64
- 65 and above

Please specify your ethnicity

- White
- Hispanic or Latino

- Black or African American
- Native American or American Indian
- Asian / Pacific Islander
- Other
- Prefer not to answer

What is the highest degree or level of school you have completed? *If currently enrolled, highest degree received.*

- No schooling completed
- Some high school, no diploma
- High school graduate, diploma or the equivalent (for example: GED)
- Some college credit, no degree
- Trade/technical/vocational training
- Associate degree
- Bachelor's degree
- Master's, Professional, or Doctorate degree

What is your marital status?

- Single, never married
- Married or domestic partnership
- Widowed
- Divorced
- Separated

Are you currently...?

- Employed for wages
- Self-employed
- Out of work and looking for work
- Out of work but not currently looking for work
- A homemaker
- Military
- Retired
- Unable to work



May I ask, what is your annual household income?

- Under \$40,000
- \$40,000-99,000
- \$100,000-149,999
- \$150,000-250,000
- \$250,000 or more
- No Response

I consider myself a religious person.

- Strongly agree
- Agree
- Somewhat agree
- Neither agree nor disagree
- Somewhat disagree
- Disagree
- Strongly disagree

Have you been admitted to the hospital in the last 5 years?

- Yes
- No

Do you have a friend or a family member who was admitted to the hospital from COVID-19?

- Yes
- No

Do you have a friend or a family member who passed away from COVID-19?

- Yes
- No

Do you currently work in a healthcare setting (e.g. nurse, doctor, therapist, etc.)?

- Yes
- No

Do you have any conditions (cancer, heart/kidney/lung disease, weakened immune system, obesity, pregnancy, diabetes) that predispose you to higher risk of dying from COVID-19?

- Yes
- No

### Block 3

This is your completion ID    `#{e://Field/Random%20ID}`

Copy this value to paste into MTURK

When you have copied this ID, please click the next button to submit your survey.

Powered by Qualtrics
